# Supplementary material
Source: HighWire-hosted journal article supplement (https://www.rcpjournals.org/highwire/filestream/12052/field_highwire_adjunct_files/1/Zhang_supplementary_material_S2.pdf)
Supplement: Zhang_supplementary_material_S2.pdf [file Zhang_supplementary_material_S2.pdf]

## Supplementary material S2

### Baseline and outcome for cases not proceeding for thrombectomy

|                                                     | Proceed MT<br>n=219 | Not proceed MT<br>n=77 | p                | Improved on<br>arrival<br>n=30 | Established infarct on<br>arrival<br>n=47 | p                |
|-----------------------------------------------------|---------------------|------------------------|------------------|--------------------------------|-------------------------------------------|------------------|
| Age (y) (IQR)                                       | 70 (56-77)          | 71 (58-77)             | 0.634            | 65 (58-76)                     | 71 (58-80)                                | 0.717            |
| Male (%)                                            | 51.6                | 50.6                   | 0.886            | 50.0                           | 51.1                                      | 0.927            |
| Pre-stroke mRS 0-1 (%)                              | 89.0                | 85.7                   | 0.437            | 86.7                           | 85.1                                      | 0.894            |
| NIHSS change<br>Mean (IQR)                          | -                   | -                      |                  | -11.5 (-8,-16)                 | 1 (0, 3)                                  | <b>&lt;0.000</b> |
| Sites of arterial occlusion (%)                     |                     |                        |                  |                                |                                           |                  |
| Intracranial ICA<br>terminal                        | 27.9                | 29.9                   | 0.672            | 3.3                            | 40.4                                      | <b>0.011</b>     |
| MCA M1                                              | 58.4                | 70.1                   | <b>&lt;0.000</b> | 86.7                           | 59.6                                      | 0.443            |
| Tandem occlusion                                    | 17.6                | 20.8                   | 0.503            | 16.7                           | 23.4                                      | 0.477            |
| Good collateral (%)                                 | 66.5                | 62.3                   | <b>0.026</b>     | 100                            | 38.3                                      | <b>&lt;0.000</b> |
| Intravenous thrombolysis (%)                        | 83.1                | 65.8                   | 0.790            | 90.0                           | 80.9                                      | 0.280            |
| DTD mean (IQR) min                                  | 170<br>(149-202)    | 188.5<br>(146-234)     | 0.086            | 192<br>(146-222)               | 180<br>(142-235)                          | 0.588            |
| Transfer DTD time > 180 min (%)                     | 41.1                | 58.4                   | <b>0.029</b>     | 53.3                           | 57.4                                      | 0.692            |
| OOH (%)                                             | 54.8                | 59.7                   | 0.192            | 60.0                           | 57.4                                      | 0.719            |
| Nocturnal (%)**                                     | 36.5                | 63.5                   | 0.233            | 50.0                           | 29.8                                      | 0.165            |
| Good functional outcome at 90-<br>day mRS 0-2 % (N) | 41.6                | 33.3                   | <b>&lt;0.000</b> | 83.3 (20/24)*                  | 2.6 (1/39)*                               | <b>&lt;0.000</b> |
| Mortality at 90 day % (N)                           | 18.3                | 28.6                   | <b>&lt;0.000</b> | 4.2 (1/24)*                    | 43.6 (17/39)*                             | <b>0.002</b>     |

DTD = door-to-door time = time from initial presentation at a referring stroke centre to arrival at the thrombectomy centre; ICA = internal carotid artery; MCA = middle cerebral artery; mRS = modified Rankin Scale; NIHSS = National Institutes of Health Stroke Scale; SD = standard deviation; OOH = out of hours.

\*In patients without thrombectomy, only 24 patients in improved group and 39 patients in established infarct group had 90 day outcome follow up. \*\*including weekday and weekend
